# Supplementary material
Source: ML conference proceedings conference paper supplement (https://openaccess.thecvf.com/content/CVPR2023/html/Li_Boosting_Low-Data_Instance_CVPR_2023_paper.html)
Supplement: Supplementary file 1 [file Li_Boosting_Low-Data_Instance_CVPR_2023_supplemental.pdf]

## 6. Supplementary Material

### 6.1. Ablation of kernel-supervised learning

Here we add an external experiment for the ablation study of kernel-supervised learning to prove its performance improvement. It was tested on both Cityscapes and CTW1500 datasets. As shown in table 8, kernel-

Table 8. Ablation of kernel supervised learning.

| $L_{ker}$ | Cityscapes |           |           | CTW1500 |           |           |
|-----------|------------|-----------|-----------|---------|-----------|-----------|
|           | $mAP$      | $AP_{50}$ | $AP_{75}$ | $mAP$   | $AP_{50}$ | $AP_{75}$ |
| ✓         | 30.6       | 55.4      | -         | 34.6    | 71.1      | 31.0      |
| ✗         | 29.3       | 54.3      | -         | 32.8    | 69.5      | 29.3      |

supervised learning shows significant improvement on both two datasets, which, from the perspective of cross-domain, indicates that kernel supervision plays a complementary role to prevent over-fitting. Hence both two datasets are two different domains.

### 6.2. Compared with longer schedule DenseCL

The ResNet backbone is initialized with DenseCL. Hence it is much fairer for us to provide an experiment that compares our pre-training method with DenseCL with longer training schedule. The result shows that our pre-

Table 9. Comparison with a longer schedule DenseCL.

| DenseCL pt epoch | SP | mAP         | $AP_{50}$   | $AP_{75}$   |
|------------------|----|-------------|-------------|-------------|
| 200              | ✓  | <b>23.5</b> | <b>41.4</b> | <b>23.7</b> |
| 300              | ✗  | 20.6        | 36.6        | 20.6        |

training method achieves better performance than DenseCL with comparable training time, which is shown in table 9.
